# Supplementary material for: Expansion of KRAS hot spot mutations reactive T cells from human pancreatic tumors using autologous T-cells as the antigen-presenting cells
Source: Research Square preprint supplement (doi:10.21203/rs.3.rs-1944651/v1), 2022-08-16
Supplement: Supplementary file 1 [file 3e9c9d84e18e99c9852df310.pdf]

**Figure S1**

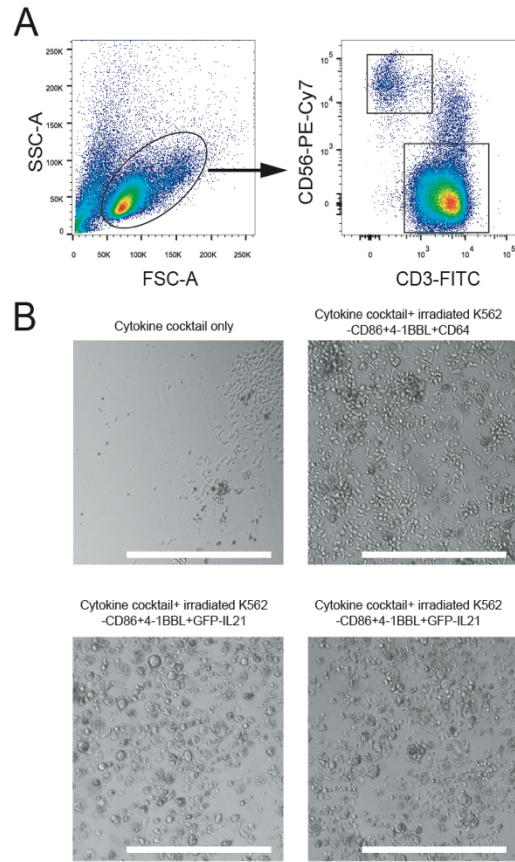

**K562 based feeder cells greatly enhanced the proliferation of TIL fragment cultures.**

- A. Gating strategy for phenotype analysis of TIL cultures.
- B. B. Representative microscopic photogram of individual well of TIL cultures showing the effect of different K562 based feeder cells on growth of activated lymphocytes. The shining “thunderball” like cells are lymphocytes expanded from tumor fragments, whereas the large granular “fat” cells are K562 feeder cells.

**Figure S2**

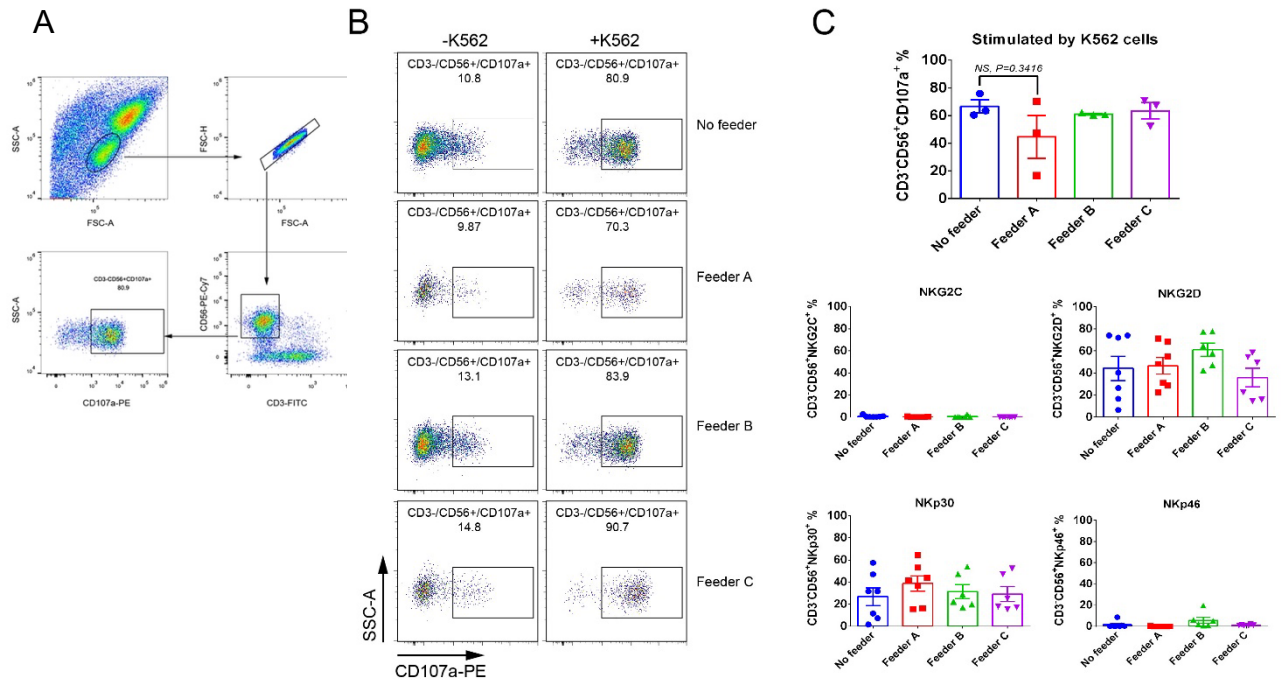

**NK cells expanded from tumor fragments are functional and express multiple NK receptors.** TIL cultures were subjected to flow cytometry analysis to measure the upregulation of CD107a. The NK cell population were gated based on size and expression of CD56 and negative expression of CD3.

- A . NK functional activity was measured by flow cytometry analysis. One representative result was shown. CD107a functional assay showed NK cells generated from fragment cultures using different feeder cells were capable to degranulate when they were re-stimulated by K562 cells.
- B . Summary of data from multiple samples from different patients. The quantified cell surface levels of CD107a were analyzed by FlowJo. Data represent mean  $\pm$ SD, n = 3. P values were determined by ordinary (no pairing) one-way ANOVA test.
- C . NKG2C, NKG2D, NKp30 and NKp46 expression on the NK cells generated from different feeder cells. Bar graphs represents the percentage of NK cells expressing corresponding NK receptors.

**Figure S3**

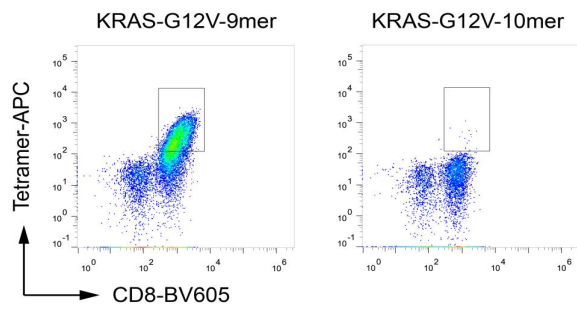

**Identify the specificity of KRAS-G12V-9mer and KRAS-G12V-10mer tetramer.**

PBMCs from a human donor were transduced with the PCV TCR and stained with KRAS-G12V-9mer or KRAS-G12V-10mer tetramer, shown by flow cytometric plot.

**Figure S4**

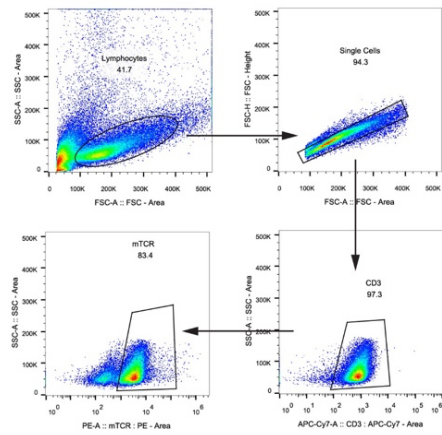

**Gating strategy for identification of T cells that express mouse TCR (mTCR).**

After *in vitro* sanitization with TMG-T cells and expansion in defined medium, we analyze the percentage of T cells that express mouse TCR by flow cytometry.

**Table S1****Patient clinical information: Cancer Clinical stage, CA 19-9, KRAS mutation****type.**

Tumor tissues of 70 patients were collected. 64/70 patients with PDAC, 6/70 patients with other diseases determined by pathological section after the surgery. 7/64 patients received neoadjuvant therapy before tumor resection.

| Patient ID | Cancer Type                                                        | Clinical Stage | CA 19-9 | KRAS Mutation |
|------------|--------------------------------------------------------------------|----------------|---------|---------------|
| NJ001      | PDAC, moderate differentiation                                     | III            | 192     | G12D          |
| NJ002      | PDAC, moderate to poorly differentiation                           | II             | 278     | G12V          |
| NJ003      | PDAC, moderate to poorly differentiation                           | N/A            | >1000   | G12D          |
| NJ004      | PDAC, moderate differentiation                                     | III            | 459     | WT            |
| NJ005**    | PDAC, moderate differentiation                                     | N/A            | 633     | WT            |
| NJ006      | PDAC, moderate to poorly differentiation                           | I              | >1000   | G12D          |
| NJ007      | PDAC, moderate to poorly differentiation                           | III            | 22      | G12V          |
| NJ008      | PDAC, moderate differentiation                                     | N/A            | 137     | G12D          |
| NJ009      | PDAC, moderate differentiation                                     | I              | 3.7     | WT            |
| NJ010      | PDAC, moderate differentiation                                     | IV             | >1000   | G12D          |
| NJ011      | PDAC, moderate to poorly differentiation                           | N/A            | 127     | G12D          |
| NJ012      | PDAC                                                               | N/A            | 371     | G12D          |
| NJ013*     | spindle cell carcinoma of the pancreas                             | N/A            | 13      | WT            |
| NJ014      | PDAC, well differentiation                                         | IV             | >1000   | G12R          |
| NJ015      | PDAC, poor differentiation                                         | III            | 864     | G12R          |
| NJ016      | PDAC, moderate to poorly differentiation                           | III            | 313     | G12V          |
| NJ017      | PDAC, moderate differentiation                                     | N/A            | >1000   | G12V          |
| NJ018      | PDAC, moderate differentiation                                     | II             | >1000   | G12D          |
| NJ019      | PDAC, liver metastases                                             | IV             | 113     | WT            |
| NJ020*     | chronic pancreatitis                                               | N/A            | 54      | N/A           |
| NJ021      | PDAC, moderate differentiation                                     | I              | 39      | G12D          |
| NJ022      | PDAC, squamous cell carcinoma 30%<br>cystadenoma of carcinogenesis | III            | 184     | G12D          |
| NJ023*     |                                                                    | I              | 23      | WT            |
| NJ024      | PDAC, moderate to poorly differentiation                           | III            | 15      | G12D          |
| NJ025      | PDAC, moderate differentiation                                     | II             | 83      | G12D          |
| NJ026      | PDAC                                                               | III            | 458     | G12D          |
| NJ027      | PDAC, moderate differentiation                                     | III            | 195     | G12D          |
| NJ028      | PDAC, moderate to poorly differentiation                           | II             | 228     | WT            |
| NJ029      | PDAC                                                               | III            | 19.8    | WT            |
| NJ030      | PDAC, moderate differentiation                                     | IV             | 198     | G12V          |
| NJ031      | PDAC, moderate differentiation                                     | I              | 431     | WT            |
| NJ032**    | PDAC, with metastases                                              | N/A            | >1000   | G12D          |
| NJ033      | PDAC, poor differentiation                                         | II             | 95      | WT            |
| NJ034      | PDAC, moderate differentiation                                     | II             | 217     | G12V          |
| NJ035      | PDAC, moderate differentiation                                     | II             | >1000   | G12R          |
| NJ036**    | PDAC, moderate differentiation                                     | III            | 43      | G12D          |
| NJ037      | PDAC, moderate differentiation                                     | III            | 287     | WT            |
| NJ038      | PDAC, moderate to poorly differentiation                           | II             | 8.59    | WT            |
| NJ039      | PDAC, moderate differentiation                                     | I              | 432     | G12D          |
| NJ040      | PDAC, moderate differentiation                                     | II             | 18      | G12D          |
| NJ041      | PDAC, moderate differentiation                                     | III            | 214     | G12D          |
| NJ042      | PDAC, moderate to poorly differentiation                           | III            | 170     | G12D          |
| NJ043      | PDAC, moderate differentiation                                     | I              | 58.25   | G12D          |
| NJ044      | PDAC, poor differentiation                                         | III            | 88.92   | G12V          |
| NJ045      | PDAC, moderate differentiation                                     | III            | 457     | Q61H          |
| NJ046      | PDAC, moderate to poorly differentiation                           | III            | 131     | WT            |
| NJ047      | PDAC, poor differentiation                                         | III            | >1000   | G12V          |
| NJ048*     | chronic pancreatitis                                               | N/A            | 59      | WT            |
| NJ049      | PDAC, with metastases                                              | IV             | >1000   | G12V          |
| NJ050**    | PDAC, moderate differentiation                                     | II             | 74      | G12R          |
| NJ051**    | PDAC, moderate differentiation                                     | III            | 43      | G12V          |
| NJ052*     | Duodenal carcinoma                                                 | N/A            | 150     | G12D          |
| NJ053      | PDAC, poor differentiation                                         | II             | 289     | G12D          |
| NJ054      | PDAC, moderate to well differentiation                             | III            | 277     | G12V          |
| NJ055      | PDAC, moderate differentiation                                     | III            | >1000   | WT            |
| NJ056      | PDAC, moderate differentiation                                     | II             | 3.5     | G12V          |
| NJ057      | PDAC, moderate to poorly differentiation                           | I              | 33      | G12V          |
| NJ058**    | PDAC, poor differentiation                                         | IV             | >1000   | WT            |
| NJ059      | PDAC, moderate differentiation                                     | IV             | >1000   | WT            |
| NJ060*     | Breast cancer, pancreatic metastases                               | N/A            | 340     | WT            |
| NJ061      | PDAC, moderate to poorly differentiation                           | II             | 16      | G12D          |
| NJ062      | PDAC, moderate differentiation                                     | II             | 20      | G12D          |
| NJ063      | PDAC, moderate to poorly differentiation                           | II             | 129     | G12D          |
| NJ064      | PDAC, moderate to poorly differentiation                           | II             | 208     | G12V          |
| NJ065      | PDAC, moderate to poorly differentiation                           | II             | 130     | G12D          |
| NJ066**    | PDAC, moderate differentiation                                     | N/A            | 2.97    | WT            |
| NJ067      | PDAC, moderate differentiation                                     | I              | 74      | Q61H          |
| NJ068      | PDAC, moderate differentiation                                     | II             | 69      | G12V          |
| NJ069      | PDAC, moderate differentiation                                     | III            | 20      | G12D          |
| NJ070      | PDAC, moderate differentiation                                     | II             | 753     | G12V          |

Note: \* patients with other diseases determined by pathological section after the surgery, \*\* patients received neoadjuvant

therapy before tumor resection.

Note

### **TILs expanded with feeder cells are highly cytolytic**

To determine the ability of TILs to degranulate upon incubation with an NK cell target, we mixed  $4 \times 10^5$  TILs with  $4 \times 10^5$  K562. We incubated them for four hours in the presence of anti-CD107a antibody (1:100) and protein transport inhibitor (1:1000) at a 96-well plate. A culture containing  $4 \times 10^5$  TILs only was included as the negative control. After incubation, cells were washed with PBS containing 0.1% BSA, then 100  $\mu$ l of antibody diluent (1:200 anti-CD3, 1:200 anti-CD4, 1:200 anti-CD8, and 1:200 anti-CD56) was added to the cells and incubated for 30 min at 40°C. Cells were then subjected to flow cytometry analysis to determine the ability of NK cell degranulation, as shown in supplementary data Figure S2

Macron et al. found the relative abundance of NK cells in pancreatic tumors to be lower than in peripheral blood, and these NK cells in PDAC are typically dysfunctional due to the downregulation of activation receptors and CD16<sup>(1)</sup>. The phenotype of ex-vivo expanded TIL-NK was assessed by flow cytometry using antibodies against NK receptors or activation markers – NKG2C, NKG2D, NKp30, and NKp46. We found no difference in expression of these four markers between NK expanded with different feeder cells (Figure S2C).

Surprisingly, we found no NKG2c and NKp46 expression on these ex-vivo expanded TILs. On average, around 50% of ex-vivo expanded TILs expressed NKG2D and NKp30 on their surface. To determine the functional activity of ex-vivo expanded TIL-NK cells, we measured the degranulation marker CD107a expression on NK cells after challenge with K562 target cells (Figures S2A and 3). Around 60% of NK cells rapidly degranulated. However, the NK cells

expanded most vigorously by ECCE feeder cells were less functional at degranulation (30%) (Figure S2B). The reduced NK degranulation reactivity could be explained by NK desensitizing effect by feeder cells which are based on K562 cells<sup>(2,3)</sup>. However, this desensitizing effect might be negated by the expression of mIL-21 on feeder cells.

References:

- bm1. Marcon F, Zuo J, Pearce H *et al.* NK cells in pancreatic cancer demonstrate impaired cytotoxicity and a regulatory IL-10 phenotype. *Oncoimmunology*. 2020;**9**:1845424.doi:10.1080/2162402X.2020.1845424
- bm2. Thompson TW, Kim AB, Li PJ *et al.* Endothelial cells express NKG2D ligands and desensitize antitumor NK responses. *Elife*. 2017;**6**:e30881.doi:10.7554/eLife.30881
- bm3. Ardolino M, Azimi CS, Iannello A *et al.* Cytokine therapy reverses NK cell anergy in MHC-deficient tumors. *J Clin Invest*. 2014;**124**:4781-4794.doi:10.1172/JCI74337
